# Supplementary material for: Epithelial microRNA-206 targets CD39/extracellular ATP to upregulate airway IL-25 and TSLP in type 2-high asthma
Source: JCI journal article supplement (doi:10.1172/jci.insight.148103), 2021-05-04
Supplement: sd1 [file 1]

**Online Data Supplement:**

**Epithelial microRNA-206 targets CD39/extracellular ATP to upregulate airway  
IL25 and TSLP in type 2-high asthma**

**Kan Zhang<sup>1,2,3\*</sup>, Yuchen Feng<sup>1,2\*</sup>, Yuxia Liang<sup>1,2</sup>, Wenliang Wu<sup>1,2</sup>, Chenli  
Chang<sup>1,2</sup>, Dian Chen<sup>1,2</sup>, Shengchong Chen<sup>1,2</sup>, Jiali Gao<sup>1,2</sup>, Gongqi Chen<sup>1,2</sup>,  
Lingling Yi<sup>1,2</sup>, Dan Cheng<sup>4</sup>, Guohua Zhen<sup>1,2†</sup>**

<sup>1</sup>Division of Pulmonary and Critical Care Medicine, Department of Internal Medicine, Tongji Hospital, Tongji Medical College, Huazhong University of Science and Technology, Wuhan, China; <sup>2</sup>Key Laboratory of Respiratory Diseases, National Health Commission of People's Republic of China, and National Clinical Research Center for Respiratory Diseases, Wuhan, China; <sup>3</sup>Department of Respiratory and Critical Care Medicine, The Affiliated Suzhou Hospital of Nanjing Medical University, Suzhou, China; <sup>4</sup>Department of Respiratory and Critical Care Medicine, Renmin Hospital of Wuhan University, Wuhan, China.

**Supplementary Table. Primers for quantitative PCR**

| Gene            | Species | Type    | Sequence                |
|-----------------|---------|---------|-------------------------|
| <i>β-actin</i>  | Human   | Forward | GCAAGCAGGACTATGACGAG    |
|                 |         | Reverse | CAAATAAAGCCATGCCAATC    |
| <i>CD39</i>     | Human   | Forward | ACTATCGAGTCCCCAGATAATGC |
|                 |         | Reverse | CCTGATCCTTCCCATAGCACAA  |
| <i>CLCA1</i>    | Human   | Forward | ATGGCTATGAAGGCATTGTCTG  |
|                 |         | Reverse | TGGCACATTGGGGTCGATTG    |
| <i>GAPDH</i>    | Human   | Forward | AAGGTGAAGGTCGGAGTCAAC   |
|                 |         | Reverse | GGGGTCATTGATGGCAACAATA  |
| <i>POSTN</i>    | Human   | Forward | GACCGTGTGCTTACACAAATTG  |
|                 |         | Reverse | AAGTGACCGTCTCTTCCAAGG   |
| <i>SERPINB2</i> | Human   | Forward | TCCTGGGTCAAGACTCAAACC   |
|                 |         | Reverse | CATCCTGGTATCCCCATCTACA  |
| <i>β-actin</i>  | Mouse   | Forward | GGCTGTATTCCCCTCCATCG    |
|                 |         | Reverse | CCAGTTGGTAACAATGCCATGT  |
| <i>Gapdh</i>    | Mouse   | Forward | TGGCCTTCCGTGTTTCCTAC    |
|                 |         | Reverse | GAGTTGCTGTTGAAGTCGCA    |
| <i>Cd39</i>     | Mouse   | Forward | AGATGAAATCGGTGCGTACCT   |
|                 |         | Reverse | GAGTCTGGTGATGCTTGGATG   |

**Supplementary Figures and Figure Legends:**

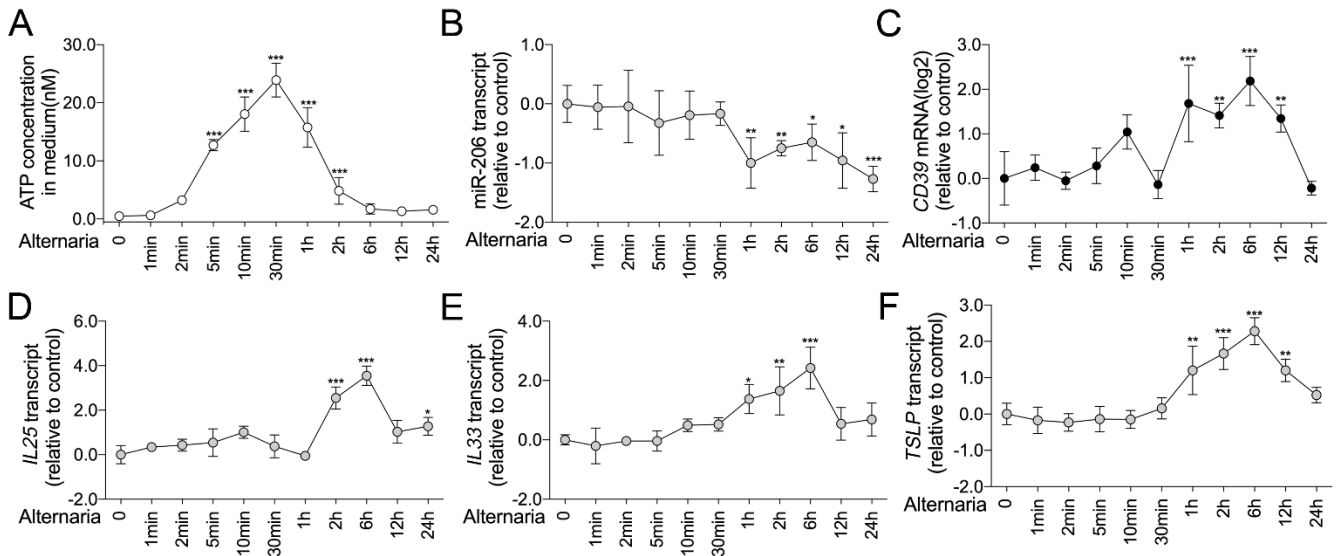

**Supplementary Figure 1. The kinetics of extracellular ATP and the expression of miR-206, CD39, IL25, IL33, and TSLP in BEAS-2B cells after Alternaria stimulation.** (A) ATP concentration in BEAS-2B cells culture medium collected at indicated time points after Alternaria (50  $\mu\text{g/ml}$ ) stimulation was measured by luciferase bioluminescence. (B-F) Transcript levels of miR-206 (B), CD39 (C), IL25 (D), IL33 (E) and TSLP (F) in BEAS-2B cells harvested at indicated time points after Alternaria (50  $\mu\text{g/ml}$ ) stimulation were determined by quantitative PCR. n = 4 wells per group. Data are mean  $\pm$  SD. \* $P < 0.05$ ; \*\* $P < 0.01$ ; \*\*\* $P < 0.001$ ; \*\*\*\* $P < 0.0001$  (one-way ANOVA with Bonferroni's post hoc test).

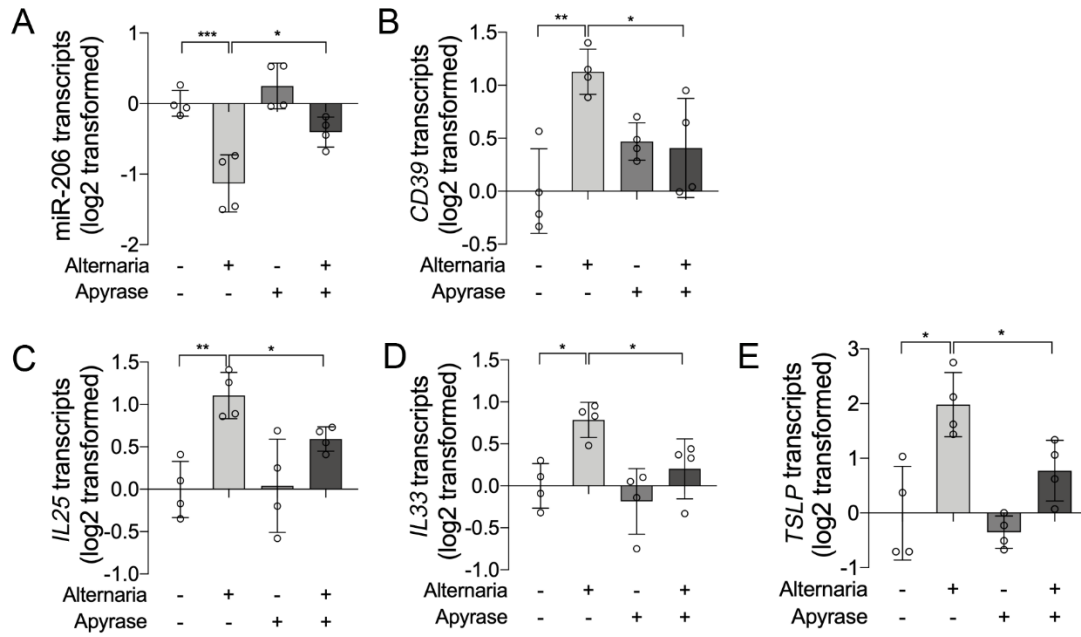

**Supplementary Figure 2. Extracellular ATP is required for Alternaria-induced**

**miR-206, CD39, IL25, IL33 and TSLP expression in BEAS-2B cells.** (A-B) miR-206

(A) and CD39 (B) transcript levels in BEAS-2B cells pretreated with apyrase or saline for 2 h before adding Alternaria (50 µg/ml) and stimulation for 6 h. The transcript levels are expressed as relative to the mean value of control group and log2 transformed. (C-

D) IL25 (C), IL33 (D) and TSLP (E) transcript levels in BEAS-2B cells pretreated with

apyrase or saline for 2 h before adding Alternaria (50 µg/ml) and stimulation for 6 h.

The transcript levels are expressed as relative to the mean value of control group and

log2 transformed. n = 4 wells per group. The data are shown as mean ± SD. \*P < 0.05;

\*\*P < 0.01; \*\*\*P < 0.001 (one-way ANOVA with Bonferroni's post hoc test).

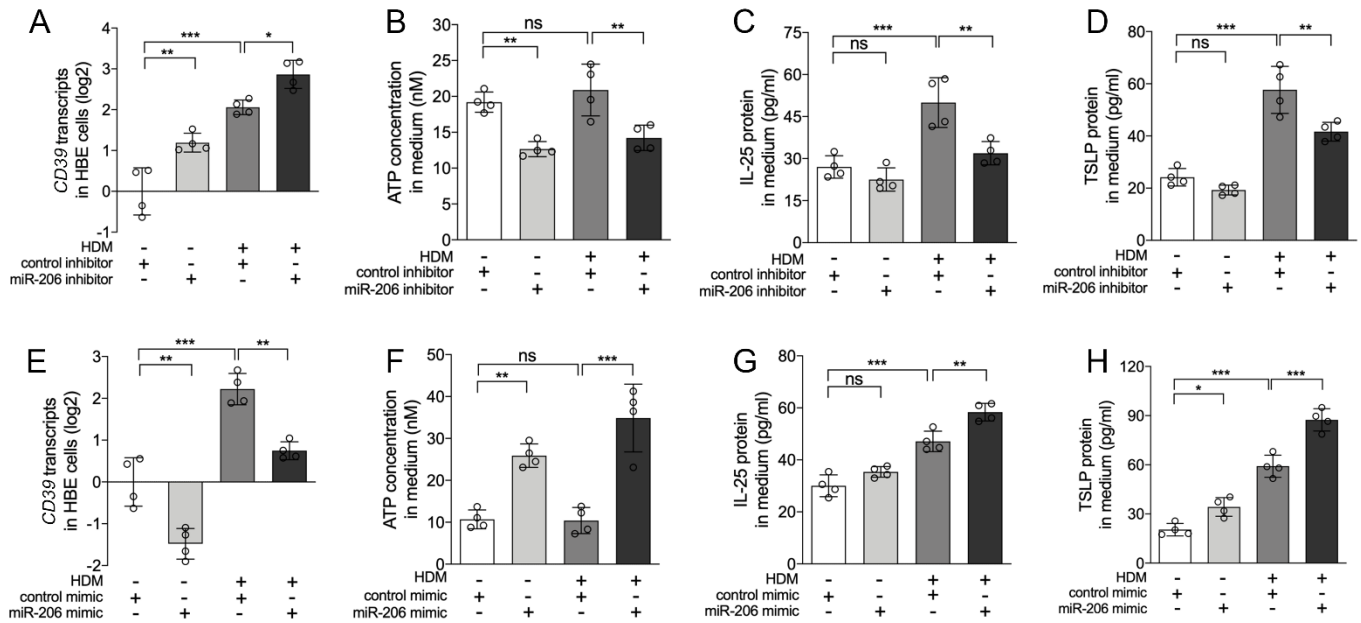

**Supplementary Figure 3. MiR-206 regulates allergen-induced IL-25 and TSLP expression via targeting CD39 - extracellular ATP axis in bronchial epithelial cells.**

(A) *CD39* transcript levels in HBE cells transfected with control or miR-206 inhibitor and stimulated with or without HDM for 6 h were determined by quantitative PCR. (B) ATP concentration in culture medium after transfection with control or miR-206 inhibitor and stimulation with or without HDM for 6 h were measured by luciferase bioluminescence. (C, D) IL-25 (C), and TSLP (D) protein levels in culture medium after transfection with control or miR-206 inhibitor and stimulation with or without HDM for 6 h were determined by ELISA. (E) *CD39* transcript levels in HBE cells transfected with control or miR-206 mimic and stimulated with or without HDM for 6 h were determined by quantitative PCR. (F) ATP concentration in culture medium after transfection with control or miR-206 mimic and stimulation with or without HDM for 6 h were measured by luciferase bioluminescence. (G, H) IL-25 (G), and TSLP (H) protein levels in culture medium after transfection with control or miR-206 mimic and stimulation with or without HDM for 6 h were determined by ELISA. n = 4 wells per

group combined from 2 experiments using HBE cells from 2 healthy donors. Data are mean  $\pm$  SD. \* $P < 0.05$ ; \*\* $P < 0.01$ ; \*\*\* $P < 0.001$  (one-way ANOVA with Bonferroni's post hoc test).

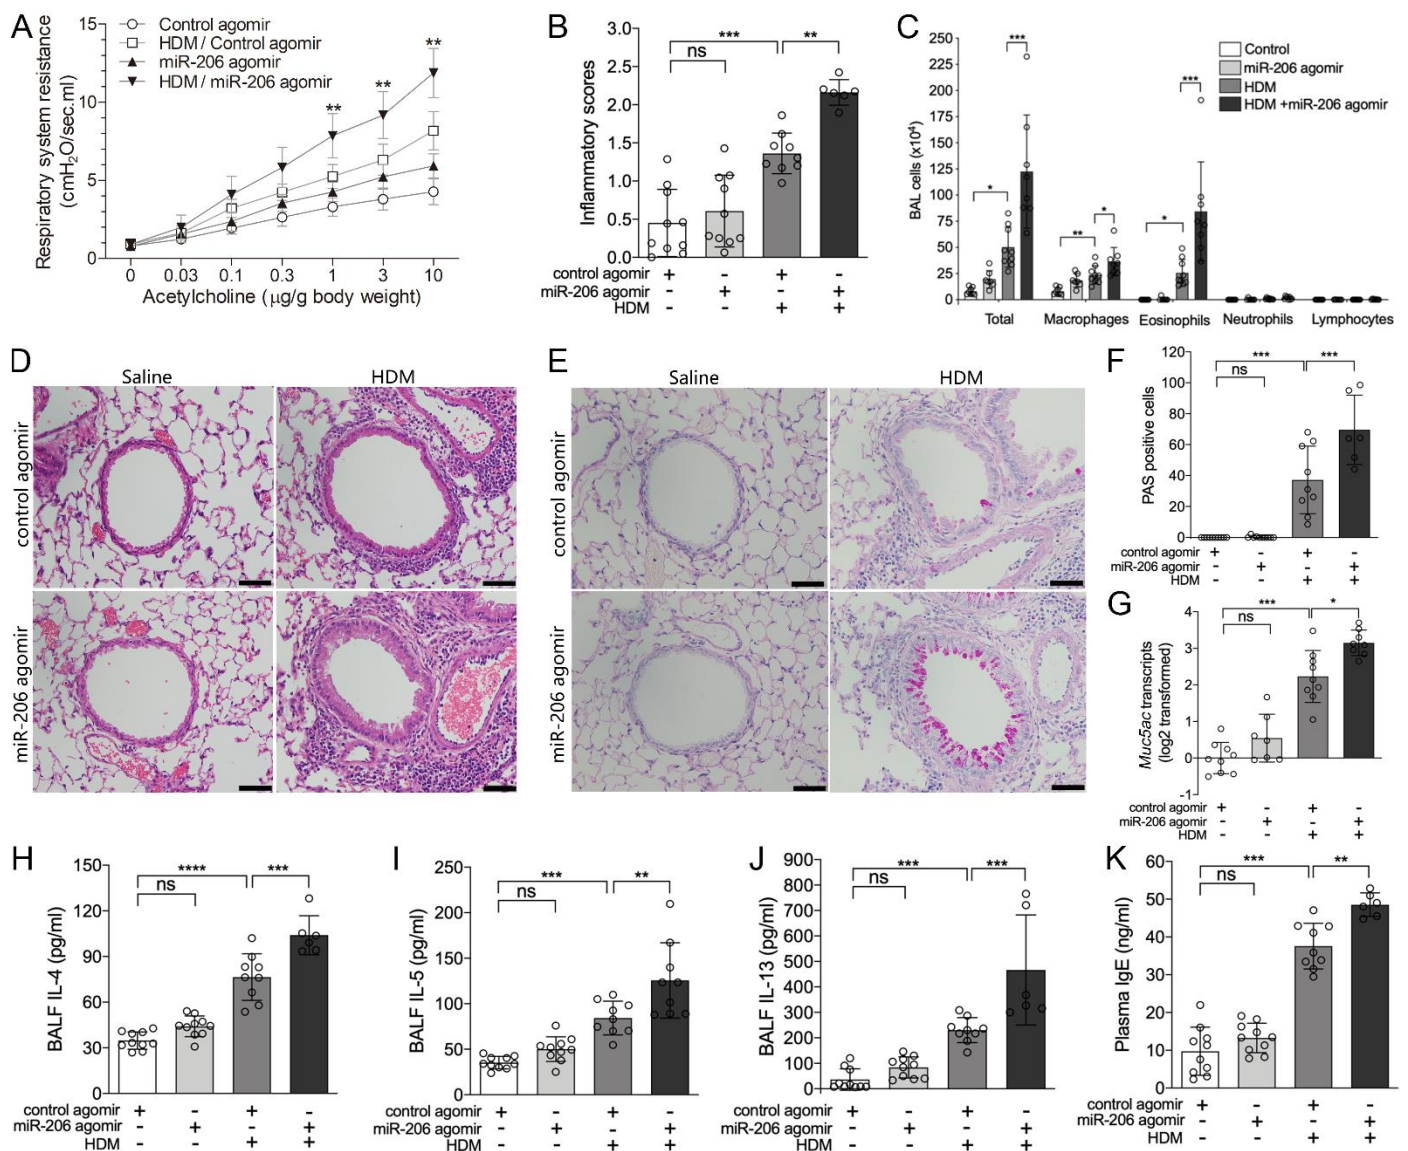

**Supplementary Figure 4. Overexpression of airway miR-206 expression aggravates HDM-induced AHR, airway inflammation, mucus overproduction and type 2 response in mice.** (A) Respiratory resistance in response to different concentration of intravenous acetylcholine at 24 h after the last HDM or saline challenge in mice intranasally administered with control or miR-206 agomir. (B) Inflammatory scores of lung sections from mice intranasally administered with control or miR-206 agomir and challenged with HDM or saline were calculated as described in

Methods. (C) Counts for macrophages, eosinophils, lymphocytes and neutrophils in BALF. (D) H&E staining of representative lung sections. (E) PAS staining for mucus in representative lung sections. (F) The numbers of PAS-staining-positive cells were counted in four random fields for each lung section at  $\times 200$  magnification. (G) *Muc5ac* transcript levels in mice lung were determined by quantitative PCR. The transcript levels are expressed as relative to the mean value of the control group and log<sub>2</sub> transformed. (H-J) The protein levels of IL-4 (H), IL-5 (I), IL-13 (J) in BALF were determined by ELISA. (K) Plasma IgE levels in peripheral blood were determined by ELISA. n = 6-10 mice per group combined from 2 experiments. Data are mean  $\pm$  SD. \* $P < 0.05$ ; \*\* $P < 0.01$ ; \*\*\* $P < 0.001$  (one-way ANOVA with Bonferroni's post hoc test). Scale bar = 50  $\mu\text{m}$ .
